# Supplementary material for: Enriched Environment Inhibits Mouse Pancreatic Cancer Growth and Down-regulates the Expression of Mitochondria-related Genes in Cancer Cells
Source: PubMed Central journal article supplement — Sci Rep. 2015 Jan 19;5:7856. doi: 10.1038/srep07856 (PMC4297951; doi:10.1038/srep07856), 2015-01-19
Supplement: srep07856-s1.pdf [file srep07856-s1.pdf]

## Supplementary Information

### Enriched Environment Inhibits Mouse Pancreatic Cancer Growth and Down-regulates the Expression of Mitochondria-related Genes in Cancer Cells

Guohua Li<sup>1\*</sup>, Yu Gan<sup>1\*</sup>, Yingchao Fan<sup>1</sup>, Yufeng Wu<sup>1</sup>, Hechun Lin<sup>1</sup>, Yanfang Song<sup>1</sup>, Xiaojin Cai<sup>1</sup>, Xiang Yu<sup>2</sup>, Weihong Pan<sup>3</sup>, Ming Yao<sup>1</sup>, Jianren Gu<sup>1</sup>, Hong Tu<sup>1</sup>

<sup>1</sup> State Key Laboratory of Oncogenes and Related Genes, Shanghai Cancer Institute, Renji Hospital, Shanghai Jiao Tong University School of Medicine, Shanghai, China.

<sup>2</sup> Institute of Neuroscience and State Key Laboratory of Neuroscience, Shanghai Institutes for Biological Sciences, Chinese Academy of Sciences, Shanghai, China.

<sup>3</sup> Blood-Brain Barrier Group, Pennington Biomedical Research Center, LA, United States.

\* These authors contributed equally to this work.

**Corresponding author:** Hong Tu, [tuhong@shsci.org](mailto:tuhong@shsci.org)

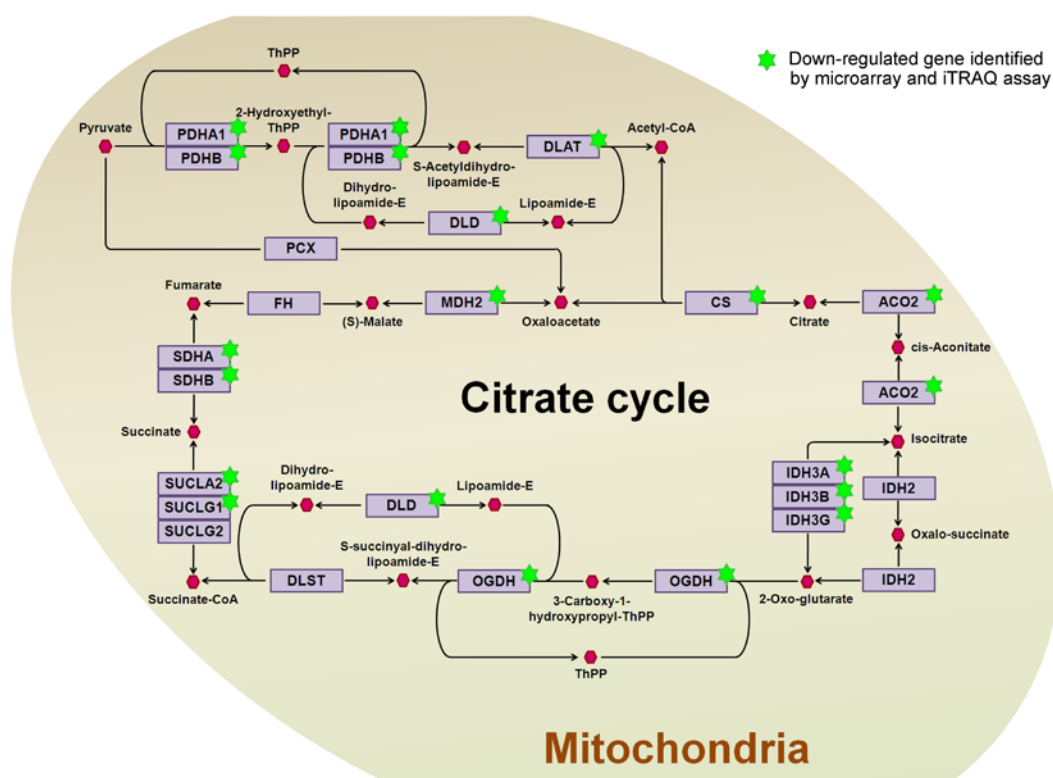

**Supplementary Figure S1 | Summary of the down-regulated genes in the citrate cycle pathway induced by enriched environment housing.** The green hexagrams indicate the down-regulated genes identified both by the microarray and by the iTRAQ assay in this study.

**Supplementary Table S1 | Differentially expressed proteins identified by iTRAQ assay**

**Supplementary Table S2 | Fold-changes for the differentially expressed genes involved in the citrate cycle and oxidative phosphorylation pathways**

| <b>Gene symble</b> | <b>Gene name</b>                                              | <b>Pathway</b>         | <b>Microarray ratio (EE:SE)</b> | <b>iTRAQ ratio (EE:SE)</b> |
|--------------------|---------------------------------------------------------------|------------------------|---------------------------------|----------------------------|
| Idh3b              | Isocitrate dehydrogenase 3 (NAD <sup>+</sup> ) beta           | Citrate cycle          | 0.156                           | 0.099                      |
| Idh3g              | Isocitrate dehydrogenase 3 (NAD <sup>+</sup> ), gamma         | Citrate cycle          | 0.361                           | 0.099                      |
| Suclg1             | Succinate-CoA ligase, GDP-forming, alpha subunit              | Citrate cycle          | 0.359                           | 0.103                      |
| Dlat               | Dihydrolipoamide S-acetyltransferase                          | Citrate cycle          | 0.328                           | 0.107                      |
| Pdha1              | Pyruvate dehydrogenase E1 alpha 1                             | Citrate cycle          | 0.332                           | 0.114                      |
| Aco2               | Aconitase 2, mitochondrial                                    | Citrate cycle          | 0.283                           | 0.117                      |
| Idh3a              | Isocitrate dehydrogenase 3 (NAD <sup>+</sup> ) alpha          | Citrate cycle          | 0.230                           | 0.128                      |
| Sucla2             | Succinate-Coenzyme A ligase, ADP-forming, beta subunit        | Citrate cycle          | 0.227                           | 0.136                      |
| Ogdh               | Oxoglutarate dehydrogenase (lipoamide)                        | Citrate cycle          | 0.281                           | 0.142                      |
| Cs                 | Citrate synthase                                              | Citrate cycle          | 0.362                           | 0.146                      |
| Dld                | Dihydrolipoamide dehydrogenase                                | Citrate cycle          | 0.452                           | 0.211                      |
| Pdhb               | Pyruvate dehydrogenase (lipoamide) beta                       | Citrate cycle          | 0.380                           | 0.236                      |
| Mdh2               | Malate dehydrogenase 2, NAD (mitochondrial)                   | Citrate cycle          | 0.393                           | 0.261                      |
| Mdh1               | Malate dehydrogenase 1, NAD (soluble)                         | Citrate cycle          | 0.489                           | 0.575                      |
| Aco1               | Aconitase 1                                                   | Citrate cycle          | 0.334                           | 0.603                      |
| Sdha               | Succinate dehydrogenase complex, subunit A, flavoprotein (Fp) | Citrate cycle & OXPHOS | 0.329                           | 0.131                      |
| Sdhb               | Succinate dehydrogenase complex, subunit B, iron sulfur (Ip)  | Citrate cycle & OXPHOS | 0.219                           | 0.560                      |
| Ndufs2             | NADH dehydrogenase (ubiquinone) Fe-S protein 2                | OXPHOS                 | 0.420                           | 0.043                      |
| Ndufab1            | NADH dehydrogenase (ubiquinone) 1, alpha/beta subcomplex, 1   | OXPHOS                 | 0.318                           | 0.069                      |
| Uqcrc2             | Ubiquinol cytochrome c reductase core protein 2               | OXPHOS                 | 0.409                           | 0.072                      |
| Uqcrb              | Ubiquinol-cytochrome c reductase binding protein              | OXPHOS                 | 0.413                           | 0.104                      |

**Supplementary Table S2 | Fold-changes for the differentially expressed genes involved in the citrate cycle and oxidative phosphorylation pathways (continued)**

| <b>Gene symble</b> | <b>Gene name</b>                                                                              | <b>Pathway</b> | <b>Microarray ratio (EE:SE)</b> | <b>iTRAQ ratio (EE:SE)</b> |
|--------------------|-----------------------------------------------------------------------------------------------|----------------|---------------------------------|----------------------------|
| Uqcrh              | Ubiquinol-cytochrome c reductase hinge protein                                                | OXPHOS         | 0.494                           | 0.177                      |
| Ndufs1             | NADH dehydrogenase (ubiquinone) Fe-S protein 1                                                | OXPHOS         | 0.348                           | 0.256                      |
| Uqcrc1             | Ubiquinol-cytochrome c reductase core protein 1                                               | OXPHOS         | 0.294                           | 0.283                      |
| Ndufv2             | NADH dehydrogenase (ubiquinone) flavoprotein 2                                                | OXPHOS         | 0.335                           | 0.296                      |
| Cox5a              | Cytochrome c oxidase, subunit Va                                                              | OXPHOS         | 0.339                           | 0.302                      |
| Ndufa9             | NADH dehydrogenase (ubiquinone) 1 alpha subcomplex, 9                                         | OXPHOS         | 0.444                           | 0.310                      |
| Ndufs3             | NADH dehydrogenase (ubiquinone) Fe-S protein 3                                                | OXPHOS         | 0.356                           | 0.313                      |
| Atp5a1             | ATP synthase, H <sup>+</sup> transporting, mitochondrial F1 complex, alpha subunit, isoform 1 | OXPHOS         | 0.454                           | 0.356                      |
| Atp5b              | ATP synthase, H <sup>+</sup> transporting mitochondrial F1 complex, beta subunit              | OXPHOS         | 0.414                           | 0.373                      |
| Ndufs6             | NADH dehydrogenase (ubiquinone) Fe-S protein 6                                                | OXPHOS         | 0.383                           | 0.429                      |
| Cox5b              | Cytochrome c oxidase, subunit Vb                                                              | OXPHOS         | 0.414                           | 0.437                      |
| Uqcrrf1            | Ubiquinol-cytochrome c reductase, Rieske iron-sulfur polypeptide 1                            | OXPHOS         | 0.256                           | 0.453                      |
| Ndufa10            | NADH dehydrogenase (ubiquinone) 1 alpha subcomplex 10                                         | OXPHOS         | 0.37                            | 0.565                      |
| Cox6c              | Cytochrome c oxidase, subunit VIc                                                             | OXPHOS         | 0.496                           | 0.592                      |
| Ndufv1             | NADH dehydrogenase (ubiquinone) flavoprotein 1                                                | OXPHOS         | 0.336                           | 0.625                      |

EE: enriched environment; OXPHOS: oxidative phosphorylation; SE: standard environment.

**Supplementary Table S3 | Primers used in quantitative RT-PCR experiments**

| <b>Gene symbol</b> | <b>Full name</b>                                 | <b>Primers</b>                                                         |
|--------------------|--------------------------------------------------|------------------------------------------------------------------------|
| Postn              | Periostin, osteoblast specific factor            | Forward: 5'-ACTCTGAGCATGGACCAACG<br>Reverse: 5'-CTGCTTGCTTCCTCTCACCA   |
| Anxa1              | Annexin A1                                       | Forward: 5'-ACTCCAGCTTTCTTTGCCGA<br>Reverse: 5'-CAATTTCCGAACGGGAGACC   |
| Krt8               | Keratin 8                                        | Forward: 5'-GGTGTCTGGGGGCATCACAG<br>Reverse: 5'-CCACTTGGTCTCCAGCATCTT  |
| Col6a3             | Collagen, type VI, alpha 3                       | Forward: 5'-CAGGCATTGCCACGACTCAT<br>Reverse: 5'-TTCCCAGCACTCCAAGAGGA   |
| Uqcrc1             | Ubiquinol-cytochrome c reductase core protein 1  | Forward: 5'-TCAGCATCTTGGACAACGGG<br>Reverse: 5'-CAGTCTCATAGCGACTGCCA   |
| Idh3b              | Isocitrate dehydrogenase 3 (NAD+) beta           | Forward: 5'-GAGCAGGTGCTGAGTTCCAT<br>Reverse: 5'-TGTGCCGAGTCTTGTATCCAG  |
| Pdha1              | Pyruvate dehydrogenase E1 alpha 1                | Forward: 5'-AAGATGCTTGCCGCTGTATCC<br>Reverse: 5'-ATCCTCTCTGGTGAGCACTGT |
| Suclg1             | Succinate-CoA ligase, GDP-forming, alpha subunit | Forward: 5'-TCAGCAGGCTTTGGAGTACG<br>Reverse: 5'-AGCCGTTGCTCCTGTTTTCT   |
| Hk2                | Hexokinase 2                                     | Forward: 5'-GGTTTCTCTATTTGGCCCCGA<br>Reverse: 5'-CATCTGAGAGACGCATGTGGT |
| Acaa2              | Acetyl-Coenzyme A acyltransferase 2              | Forward: 5'-GGACTTCTCTGCCACCGATT<br>Reverse: 5'-CCAGGTATGCCGCATCTGAA   |
| Sdha               | Succinate dehydrogenase complex, subunit A,      | Forward: 5'-ATGGAAAATGGGGAGTGCCG<br>Reverse: 5'-ACAGCTGAAGTAGGTTCCGC   |
| Actb               | Actin, beta                                      | Forward: 5'-ATGTGGATCAGCAAGCAGGA<br>Reverse: 5'-AAAGGGTGTAACGCAGCTC    |
